# Supplementary material for: Serum Exosomal MicroRNA, miR-10b-5p, as a Potential Diagnostic Biomarker for Early-Stage Hepatocellular Carcinoma
Source: PubMed Central journal article supplement (PMC7019940; doi:10.3390/jcm9010281), 2020-01-20
Supplement: jcm-09-00281-s001.pdf [file jcm-09-00281-s001.pdf]

**Table S1.** miR primer sequences used in the present study.

| microRNA        | Primer sequence                      |
|-----------------|--------------------------------------|
| has-miR-10b-5p  | 5'-TAC CCT GTA GAA CCG AAT TTG TG-3' |
| has-miR-18a-5p  | 5'-TAA GGT GCA TCT AGT GCA GAT AG-3' |
| has-miR-215-5p  | 5'-ATG ACC TAT GAA TTG ACA GAC-3'    |
| has-miR-940     | 5'-AAG GCA GGG CCC CCG CTC CCC-3'    |
| has-miR-1228-3p | 5'-TCA CAC CTG CCT CGC CCC CC-3'     |

miR, microRNA.

**Table 2.** List of predominantly overexpressed miRs in HCC-derived exosomes and tumor tissues of patients with HCC in TCGA database.

| microRNAs        | Hep3B_FC | Huh-7_FC | TCGA_Tumor_FC | P value                |
|------------------|----------|----------|---------------|------------------------|
| has-miR-940      | 1.77     | 1.63     | 1.38          | 1.26X10 <sup>-13</sup> |
| has-miR-301b-3p  | 2.38     | 1.99     | 1.56          | 6.89X10 <sup>-26</sup> |
| has-miR-135a-5p  | 4.64     | 1.56     | 1.98          | 1.3X10 <sup>-29</sup>  |
| has-miR-618      | 4.95     | 1.81     | 1.45          | 6.83X10 <sup>-7</sup>  |
| has-miR-766-3p   | 6.20     | 2.44     | 1.65          | 6.43X10 <sup>-17</sup> |
| has-miR-551b-3p  | 5.78     | 2.65     | 1.34          | 3.76X10 <sup>-3</sup>  |
| has-miR-19b-1-5p | 9.13     | 1.81     | 1.16          | 3.33X10 <sup>-2</sup>  |
| has-miR-196a-5p  | 1.76     | 23.82    | 1.60          | 5.21X10 <sup>-11</sup> |
| has-miR-96-5p    | 13.45    | 3.48     | 4.15          | 2.73X10 <sup>-55</sup> |
| has-miR-18a-5p   | 20.86    | 2.38     | 2.52          | 1.92X10 <sup>-28</sup> |
| has-miR-17-5p    | 74.22    | 1.72     | 1.88          | 3.09X10 <sup>-13</sup> |
| has-miR-182-5p   | 42.60    | 3.45     | 4.61          | 7.47X10 <sup>-33</sup> |
| has-miR-183-5p   | 56.54    | 3.58     | 5.53          | 1.97X10 <sup>-32</sup> |
| has-miR-10b-5p   | 101.32   | 12.47    | 8.75          | 7.15X10 <sup>-35</sup> |
| has-miR-196b-5p  | 180.07   | 9.71     | 2.65          | 9.60X10 <sup>-22</sup> |
| has-miR-1269a    | 137.69   | 91.38    | 11.97         | 3.03X10 <sup>-7</sup>  |
| has-miR-1269b    | 227.03   | 190.79   | 5.33          | 8.47X10 <sup>-17</sup> |
| has-miR-215-5p   | 4475.03  | 101.77   | 2.42          | 2.34X10 <sup>-32</sup> |

miR, microRNA; TCGA, The Cancer Genomic Atlas database; FC, fold change.

**Table 3.** Analysis of diagnosing HCC using combination of serum exosomal miR-10b-5p and serum AFP.

| HCC vs Non tumor        |                 |       |             |                 |                 |         |         |
|-------------------------|-----------------|-------|-------------|-----------------|-----------------|---------|---------|
|                         | <i>P</i> vs AFP | AUC   | 95% CI      | Sensitivity (%) | Specificity (%) | PPV (%) | NPV (%) |
| AFP (20 ng/ml)          | 1               | 0.707 | 0.635-0.773 | 37.778          | 71.591          | 57.627  | 52.941  |
| miR-10b-5p (1.8 fold)   | <0.0001         | 0.932 | 0.884-0.964 | 91.111          | 75.000          | 78.846  | 89.189  |
| AFP+ miR-10b-5p         | <0.0001         | 0.944 | 0.899-0.973 | 90.000          | 84.500          | 88.043  | 89.535  |
| mUICC I&II vs Non tumor |                 |       |             |                 |                 |         |         |
|                         | <i>P</i> vs AFP | AUC   | 95% CI      | Sensitivity (%) | Specificity (%) | PPV (%) | NPV (%) |
| AFP (20 ng/ml)          | 1               | 0.597 | 0.509-0.681 | 15.217          | 71.591          | 21.875  | 61.765  |
| miR-10b-5p (1.8 fold)   | <0.0001         | 0.946 | 0.894-0.978 | 93.478          | 75.000          | 66.154  | 95.652  |
| AFP+ miR-10b-5p         | <0.0001         | 0.946 | 0.893-0.978 | 86.957          | 93.182          | 86.957  | 93.182  |
| mUICC I vs Non tumor    |                 |       |             |                 |                 |         |         |
|                         | <i>P</i> vs AFP | AUC   | 95% CI      | Sensitivity (%) | Specificity (%) | PPV (%) | NPV (%) |
| AFP (20 ng/ml)          | 1               | 0.542 | 0.449-0.634 | 9.375           | 71.591          | 10.714  | 68.478  |
| miR-10b-5p (1.8 fold)   | <0.0001         | 0.934 | 0.874-0.971 | 90.652          | 75.000          | 56.863  | 95.652  |
| AFP+ miR-10b-5p         | <0.0001         | 0.933 | 0.872-0.970 | 84.375          | 88.636          | 72.973  | 93.976  |
| HCC vs CHB&LC           |                 |       |             |                 |                 |         |         |
|                         | <i>P</i> vs AFP | AUC   | 95% CI      | Sensitivity (%) | Specificity (%) | PPV (%) | NPV (%) |
| AFP (20 ng/ml)          | 1               | 0.597 | 0.514-0.676 | 37.778          | 58.333          | 57.627  | 38.462  |
| miR-10b-5p (1.8 fold)   | <0.0001         | 0.931 | 0.878-0.966 | 91.111          | 78.333          | 86.316  | 85.455  |
| AFP+ miR-10b-5p         | <0.0001         | 0.938 | 0.886-0.971 | 92.222          | 85.000          | 90.217  | 87.931  |
| mUICC I&II vs CHB&LC    |                 |       |             |                 |                 |         |         |
|                         | <i>P</i> vs AFP | AUC   | 95% CI      | Sensitivity (%) | Specificity (%) | PPV (%) | NPV (%) |
| AFP (20 ng/ml)          | 1               | 0.545 | 0.445-0.642 | 15.217          | 58.333          | 21.875  | 47.297  |
| miR-10b-5p (1.8 fold)   | <0.0001         | 0.946 | 0.884-0.981 | 93.478          | 78.333          | 76.786  | 94.000  |
| AFP+ miR-10b-5p         | <0.0001         | 0.945 | 0.883-0.980 | 86.957          | 93.333          | 90.909  | 90.323  |
| mUICC I vs CHB&LC       |                 |       |             |                 |                 |         |         |
|                         | <i>P</i> vs AFP | AUC   | 95% CI      | Sensitivity (%) | Specificity (%) | PPV (%) | NPV (%) |
| AFP (20 ng/ml)          | 1               | 0.608 | 0.500-0.708 | 9.375           | 58.333          | 10.714  | 54.688  |
| miR-10b-5p (1.8 fold)   | <0.0001         | 0.935 | 0.864-0.976 | 90.625          | 78.333          | 69.048  | 94.000  |
| AFP+ miR-10b-5p         | <0.0001         | 0.923 | 0.849-0.969 | 90.625          | 85.000          | 76.316  | 94.444  |

## Supporting Figure 1

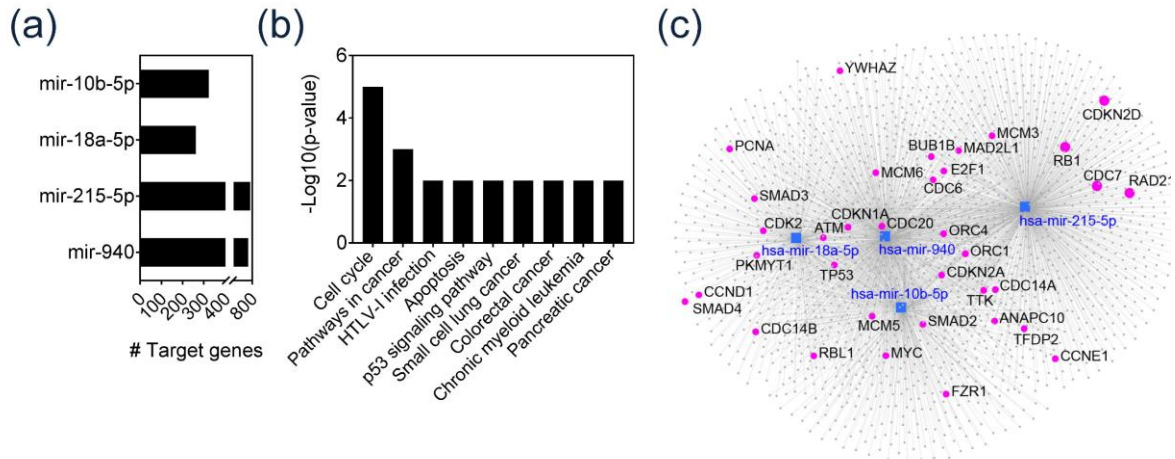

**Figure S1.** Prediction of target genes corresponding to each exo-miR using miRanda database.

## Supporting Figure 4

(a)

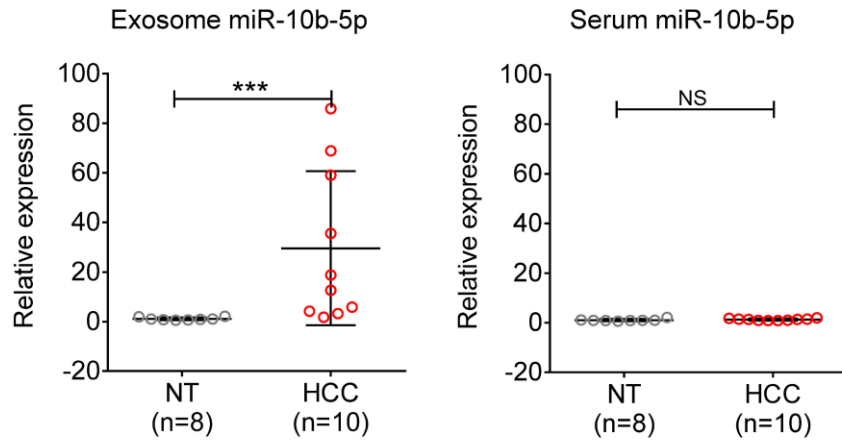

(b)

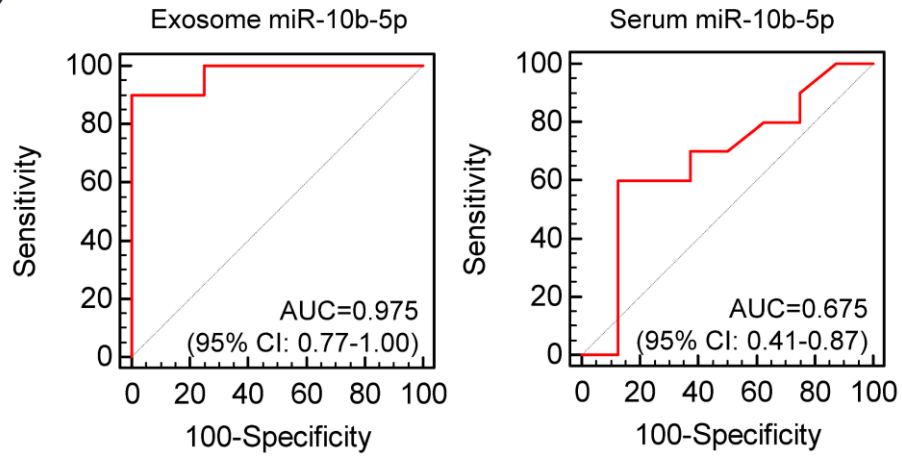

**Figure S2.** Comparison between diagnostic efficiencies of serum exo-miRNA-10b-5p and serum miRNA-10b-5p.
